# Supplementary material
Source: PubMed Central journal article supplement (PMC2890814)
Supplement: 1005383107_pnas.201005383SI.pdf [file 1005383107_pnas.201005383SI.pdf]

# Supporting Information

Koh et al. 10.1073/pnas.1005383107

## SI Text

**Generation of Mice with CD4-Specific Deletion of Th2 LCR.** RHS4,5,7 knockout (KO) mice were generated as described elsewhere (manuscript in preparation) by targeting the RHS4,5KO construct into RHS7KO ES cells (1) (Fig. S1A). By crossing the RHS4,5,7KO-Neo mice with Cre transgenic mice, we generated RHS4,5,7<sup>+/-</sup> or LCR<sup>+/-</sup> mice (Fig. S1A). Crossing LCR heterozygote mice produced no viable homozygous knockout mice, suggesting that these mice are embryonic lethal, presumably because the deletion of the entire LCR also causes deletion of *rad50* gene exons 22–24 (Fig. S1A) and *rad50* is an essential gene (2).

To generate mice with CD4-specific deletion of LCR, we crossed the RHS4,5,7KO mice with CD4-Cre transgenic mice on an LCR<sup>+/-</sup> background. In this type of cross, some progeny will have one locus that has deleted the LCR and the other locus has deleted RHS4, RHS5, and RHS7 (Fig. S1B). In mice of this genotype that have the CD4-Cre transgene(s), the region between RHS4 and RHS7 on the chromosome from the RHS4,5,7KO will be deleted by Cre-LoxP-mediated recombination in a T cell-specific manner, because of the residual LoxP sites that were introduced for the construction of the RHS4,5,7 chromosome (Fig. S1B). PCR genotyping of the CD4 T cells shows that the vast majority of these cells had, in fact, deleted the LCR (Fig. S1C). The resulting LCR<sup>-/-</sup> CD4 T cells were viable and were present in a similar number as wild-type CD4 T cells (Fig. S3).

**Evaluation of Functional Defects in the Differentiation of CD4 T Cells from cLCR KO Mice.** The number of naïve CD4 T cells from cLCR KO mice was comparable to that from wild-type mice (Fig. S4A). In addition, the number of in vitro-stimulated Th1 cells was comparable between wild-type and cLCR KO mice (Fig. S4B). However, the number of in vitro-stimulated (primary stimulation) Th2 cells from cLCR KO mice was decreased by ~40% compared to those from wild-type mice (Fig. S4B). The number of restimulated Th2 cells from cLCR KO mice was decreased by ~50% compared to that from wild-type mice (Fig. S4B). However, this lower cell number does not explain the reduction of Th2 cytokines in cLCR KO mice (Fig. 1), because at the time of restimulation, we plated the same number of primary-stimulated cells to measure cytokine production in ELISA and RT-PCR (Fig. 1). The numbers of effector/memory cells in vivo were also comparable between wild-type and cLCR KO mice (Fig. S4C). In addition, we compared the numbers of effector/memory cells in OVA-sensitized and challenged mice. The number of effector/memory cells in these mice was also comparable between wild-type and cLCR KO mice (Fig. S4D). We next examined whether the effector/memory cells present in cLCR KO mice were preferentially selected because their LCRs were not deleted because of incomplete Cre-loxP recombination. If this were the case, these cells would have selective advantage in survival dur-

ing growth and differentiation. We examined this possibility by measuring deletion of the Th2 LCR in these cells by PCR. The majority of in vitro-stimulated and restimulated cells and in vivo effector/memory cells from cLCR KO mice retained the deletion in the Th2 LCR (Fig. S5), which excluded this possibility.

**Procedures for Animal Model of Allergic Asthma. Sensitization and challenge.** Five- to 7-week-old C57BL/6 wild-type and cLCR KO mice were sensitized by i.p. injection of 20 µg of OVA (Sigma) with 100 µL of aluminum hydroxide gel in PBS on day 0 and day 5. Control mice were challenged with aluminum hydroxide gel and PBS. One week after the second immunization, mice received an aerosol challenge for 5 consecutive days (days 12–16) for 40 min each day with 1% OVA (wt/vol) in endotoxin-free PBS or endotoxin-free PBS alone. Twenty-four hours after the last exposure, the mice were killed for analysis. Experiments with live mice were approved by the Sogang University Institutional Animal Care and Use Committee.

**Total and differential cell counting of BAL fluid.** BAL fluid was obtained by washing the lung twice with 0.8 mL of PBS and was kept on ice. For total cell counting, the cells in the BAL fluids were pelleted by centrifugation at 3,600 rpm for 5 min at 4 °C and resuspended in 0.1 mL of PBS. The total number of cells was counted with a hemocytometer. For differential cell counting, BAL fluids cells were pelleted onto a glass slide at 1,500 rpm for 5 min at room temperature using cytospin (Hettich). Cells on the slides were stained with Diff-Quik solution (Sysmex), and cell types were determined by observing cell morphology and staining patterns under a microscope.

**Measurement of serum IgE.** Blood was obtained from the hearts of anesthetized mice and stored in a microtube overnight at room temperature. Serum was obtained from the blood by centrifugation at 14,000 rpm for 15 min. The level of IgE was measured by ELISA.

**Lung histology.** The lungs from OVA-challenged wild-type or cLCR KO mice were fixed in 10% neutral buffered formalin overnight and dehydrated with ethanol before paraffin embedding. Paraffin-embedded tissues were sectioned using microtome. Thin sections were hydrated by sequential treatment of xylene, 100%, 85%, and 70% ethanol and water, and stained with hematoxylin and eosin for airway inflammation, or with periodic acid-schiff (PAS) for mucus production.

**Airway hyperresponsiveness.** Airway hyperresponsiveness was measured as a change in airway resistance (cm H<sub>2</sub>O/mL/s) after challenge with aerosolized methacholine. Anesthetized (pentobarbital sodium, 70–90 mg/kg, intraperitoneal), tracheostomized (stainless-steel cannula, 18G) mice were mechanically ventilated, and lung function was assessed. Lung resistance (R<sub>L</sub>) and compliance were measured using the FlexiVent system (SCIREQ).

1. Lee GR, Spilianakis CG, Flavell RA (2005) Hypersensitive site 7 of the TH2 locus control region is essential for expressing TH2 cytokine genes and for long-range intrachromosomal interactions. *Nat Immunol* 6:42–48.

2. Luo G, et al. (1999) Disruption of mRad50 causes embryonic stem cell lethality, abnormal embryonic development, and sensitivity to ionizing radiation. *Proc Natl Acad Sci USA* 96:7376–7381.



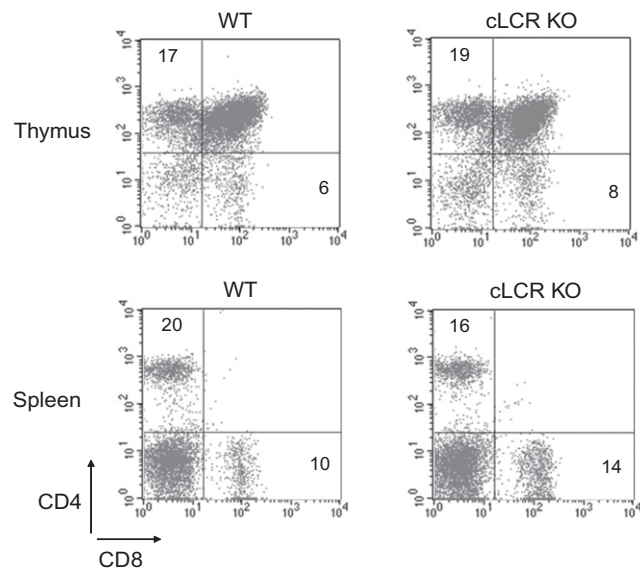

**Fig. S3.** Ratio of CD4 and CD8 cells from wild-type or cLCR KO mice. Cells in the thymus and spleen were isolated, stained with anti-CD4 and anti-CD8 antibodies, and analyzed by FACS.
